# Supplementary material for: Controlling contractile instabilities in the actomyosin cortex
Source: eLife journal article supplement (doi:10.7554/elife.19595), 2017-01-24

**A** Mean subtracted intensity data

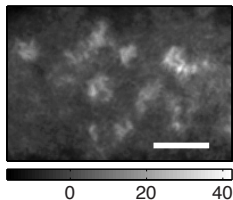

**B** Contrast enhancement

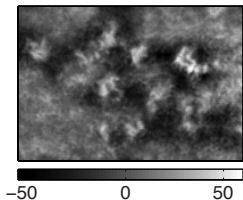

**C** Compute the spatial autocorrelation function

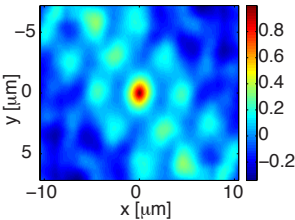

**D** Radial average

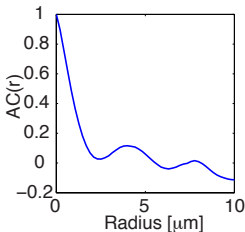

Supplement: supp [file elife-19595-supp-v1.zip]
