# Supplementary figures and images for: Controlling contractile instabilities in the actomyosin cortex
Source: eLife journal article supplement (doi:10.7554/elife.19595), 2017-01-24

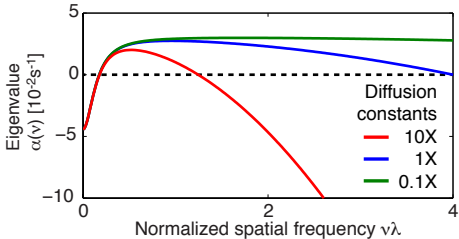

Supplement: supp [file elife-19595-supp-v1.zip]

**A**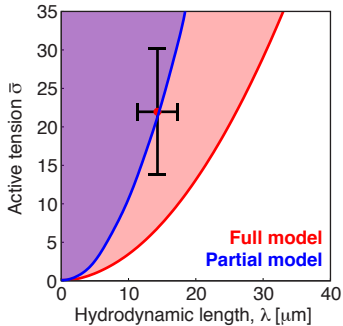**B**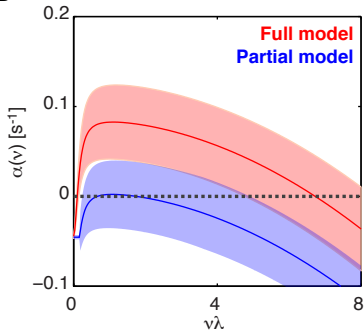

Supplement: supp [file elife-19595-supp-v1.zip]

**A**LifeAct fluorescence  $c_a$  [a.u.]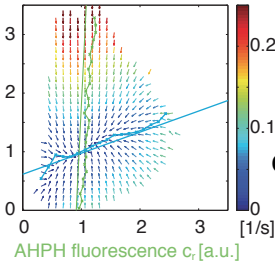**B**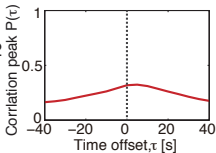**C**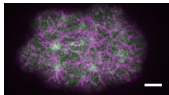

Supplement: supp [file elife-19595-supp-v1.zip]

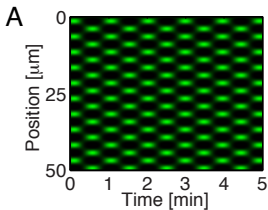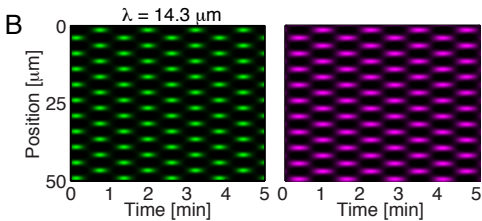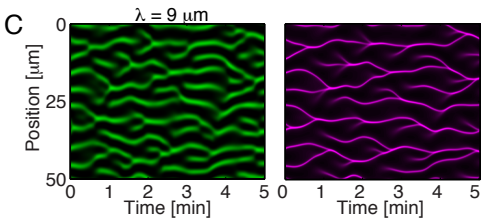

Supplement: supp [file elife-19595-supp-v1.zip]

**A**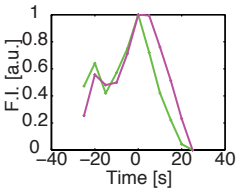**B**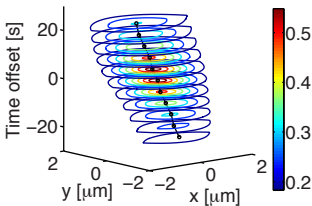**C**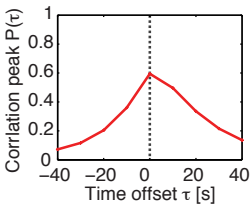

Supplement: supp [file elife-19595-supp-v1.zip]

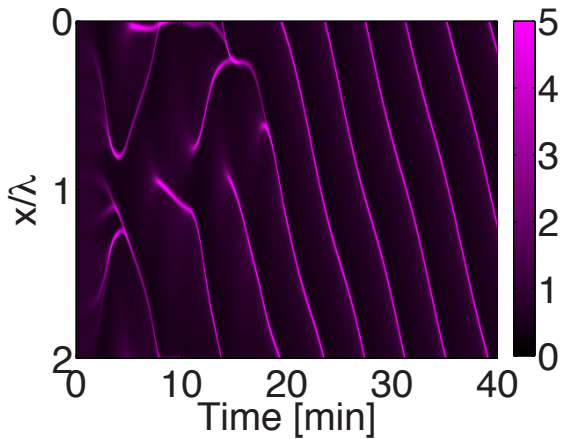

Supplement: supp [file elife-19595-supp-v1.zip]

**A**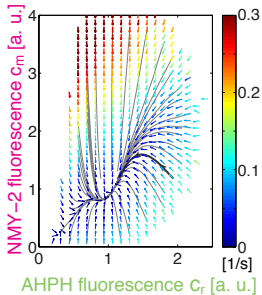**B**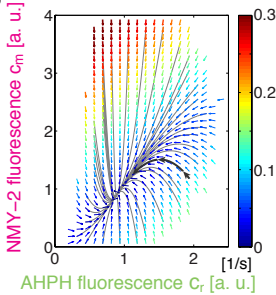**C**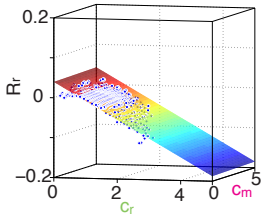**D**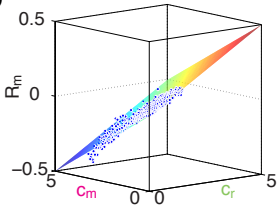

Supplement: supp [file elife-19595-supp-v1.zip]
